# Supplementary material for: Groundwater Resources in Moroccan Coastal Aquifers: Insights of Salinization Impact on Agriculture
Source: MDPI journal article supplement (doi:10.3390/environsciproc2022016048), 2022-06-16
Supplement: s1 [file s1]

**Supplemental Table S1.** Classification of groundwater samples of Moroccan coastal aquifers for suitability in irrigation.

| Classification Index           | Range                             | Classification  | Number of Samples | Source of Classification Ranges |
|--------------------------------|-----------------------------------|-----------------|-------------------|---------------------------------|
| EC ( $\mu\text{S}/\text{cm}$ ) | <250 $\mu\text{S}/\text{cm}$      | Excellent       | 1                 | [4]                             |
|                                | 250–750 $\mu\text{S}/\text{cm}$   | Good            | 42                |                                 |
|                                | 750–2250 $\mu\text{S}/\text{cm}$  | Permissible     | 194               |                                 |
|                                | 2250–5000 $\mu\text{S}/\text{cm}$ | Doubtful        | 202               |                                 |
|                                | 5000 $\mu\text{S}/\text{cm}$      | Unsuitable      | 103               |                                 |
| SAR                            | <10                               | Excellent       | 455               | [4]                             |
|                                | 10–18                             | Good            | 58                |                                 |
|                                | 18–26                             | Doubtful        | 17                |                                 |
|                                | >26                               | Unsuitable      | 12                |                                 |
| Na%                            | <20                               | Excellent       | 31                | [5]                             |
|                                | 20–40                             | Good            | 192               |                                 |
|                                | 40–60                             | Permissible     | 195               |                                 |
|                                | 60–80                             | Doubtful        | 101               |                                 |
|                                | >80                               | Unsuitable      | 23                |                                 |
| MR                             | <50                               | Suitable        | 258               | [6]                             |
|                                | >50                               | Unsuitable      | 284               |                                 |
| TH                             | <75                               | Soft            | 1                 | [7]                             |
|                                | 75–150                            | Moderately hard | 15                |                                 |
|                                | 150–300                           | Hard            | 85                |                                 |
|                                | >300                              | Very hard       | 441               |                                 |
| RSBC                           | <5 meq/L                          | Safe            | 516               | [9]                             |
|                                | 5–10 meq/L                        | Marginal        | 24                |                                 |
|                                | >10 meq/L                         | Unsatisfactory  | 2                 |                                 |
| KR                             | <1                                | Suitable        | 357               | [10]                            |
|                                | >1                                | Excess level    | 185               |                                 |
