# Supplementary material for: Groundwater Resources in Moroccan Coastal Aquifers: Insights of Salinization Impact on Agriculture
Source: MDPI journal article supplement (doi:10.3390/environsciproc2022016048), 2022-06-16
Supplement: s1 [file s1]

Archive with 1 entries (1 files):
- environsciproc-1771289-supplementary.pdf
